# Supplementary material for: Revisiting the Immigrant Risk Hypothesis: Bullying Victimisation and Sense of School Belonging of Recent Immigrants Across European Contexts
Source: Research Square preprint supplement (doi:10.21203/rs.3.rs-6411230/v1), 2025-04-17
Supplement: Supplementary file 1 [file 6cd9868d65bf7f9786607bc5.docx]

# Supplementary Materials

Cronbach’s alpha and Omega Reliability were estimated for these constructs separately across the ESS sample and each country. The findings are displayed in .

Table S1.

|  |  | Allow immigrants | Quality of life and Immigrants |
| --- | --- | --- | --- |
| Cronbach’s Alpha | Total Sample | .883 | .854 |
|  | Country-Level | .734 *(Greece)* - .934 *(Portugal)* | .732 *(Netherlands)* - .900 *(Bulgaria)* |
| Omega Reliability | Total Sample | .891 | .878 |
|  | Country-Level | .749 *(Greece)* - .940 *(Spain)* | 780 *(Netherlands/Belgium)* –  .900 *(Sweden/Bulgaria)* |

Multilevel Confirmatory Factor Analysiswas performed to extract the country-level factor scores of each of these two constructs. An overall score was also extracted, assuming a higher-order factor for attitudes towards immigrants. ML CFA weighs the impact of the factors on their indicators empirically. It also simultaneously permits the decomposition of each item's total variances into a within-part and a between-part component while controlling for random measurement errors. Thus, the derived factor scores are more suitable macro indicators than just using simple means (Dülmer et al., 2023).

##### Multigroup confirmatory factor analysis (MGCFA)

*Table S2. Testing cross-country measurement comparability: The goodness of fit indices for the two attitudinal scales*

| Model description* | χ2 | df | CFI | TLI | RMSEA | SRMR |
| --- | --- | --- | --- | --- | --- | --- |
| Allow immigrants | | | | | | |
| Configural | --- | --- | --- | --- | --- | --- |
| Metric | 5651.95 | 119 | .944 | .956 | .157 | .137 |
| Scalar | 7491.658 | 150 | .926 | .954 | .161 | .262 |
| Quality of life and immigrants | | | | | | |
| Configural | --- | --- | --- | --- | --- | --- |
| Metric | --- | --- | --- | --- | --- | --- |
| Scalar | 7369.428 | 150 | .915 | .947 | .159 | .215 |

*Configural invariance suggests that the same items measure the same construct in each group, and the overall factor structure holds across countries. Metric invariance tests whether the factor loadings are the same across countries (factor loadings denote the strength of the relationship between each item and its corresponding factor). Scalar invariance examines whether item intercepts (each item's baseline) are the same across groups. When scalar invariance is established, comparing factors directly between groups is possible. (references: Meredith, 1993; Vanderberg & Lance, 2000Billiet, 2003; Millsap, 2011).).

Our findings suggested that measurement parameters were not equal across groups, since the RMSEA and SRMR did not suggest adequate fit. However, recent literature (Davidov et al., 2018) suggests that it is sufficient that partial invariance may be more practical than full invariance. Byrne, et al. (1989) propose that having at least two items with equal factor loadings and intercepts is sufficient to establish partial invariance (Steenkamp & Baumgartner, 1998). Alternatively, it is possible that the exact test is overly stringent, and approximate rather than strict equality of item intercepts and factor loadings may be adequate for meaningful comparisons. To test for partial invariance, approximate Bayesian measurement invariance testing has been proposed (Muthén & Asparouhov, 2013; Van de Schoot et al., 2013). In this context, two fit measures are typically used to determine whether approximate equivalence is given or not (Davidov et al., 2018): the first is the posterior predictive probability value (ppp) and the second is the credibility interval (CI).

|  | Allow immigrants | Quality of life and immigrants | Migration Integration Policy Index | Education Migration Integration Policy Index | Human Development Index 2022 | Number of Refuges in the country in 2022 | Number of Asylum seekers in the country in 2022 |
| --- | --- | --- | --- | --- | --- | --- | --- |
| Allow immigrants | * | .880** | .436* | .462* | .558** | .191 | .327 |
| Quality of life and immigrants |  | * | .548** | .494** | .661** | .143 | .223 |
| Migration Integration Policy Index |  |  | * | .806** | .538** | .053 | .132 |
| Education Migration Integration Policy Index |  |  |  | * | .586** | .095 | .055 |
| Human Development Index 2022 |  |  |  |  | * | .230 | .303 |
| Number of Refuges in the country in 2022  Number of Asylum seekers in the country in 2022 |  |  |  |  |  | * | .744** |
|  |  |  |  |  |  | * |

*p<.05, **p<.01, ***p<.0001

Mplus Syntax

#### S. Three-level Multilevel Model Explaining Variability in Bullying Victimisation

title: 3-level model for bullying victimisation;

Data:

file = "PISA_ESS_devind4.dat";

Variable:!list the names of all variables in the order they appear in the .dat database.

names = cntryid schid studid sex immig nat sg fg lang books rlgbks nsibl

age par_ed hisei homepos escs qulrel belonging bullying safe

safesch onlbull senwt imm11 imm12 imm13 imm21 imm22 imm23 imm1 imm2

MIPEX MPEXEDU HDI Refugp Asylp fgs numstud fgprop s_escs;

usevar = bullying escs sg fg age nsibl sex lang fgprop imm1;

missing = all (999);

within = escs sg fg age nsibl sex lang;

between = (schid) fgprop (cntryid) imm1; !level 2 and 3 variables used in the model.

cluster = cntryid schid; !clustering variables, i.e., ID variable of the cluster

weight = senwt;

ANALYSIS: type = threelevel random; !analysis type.

model:

%WITHIN%

bullying on escs sg age sex nsibl lang;

s|bullying on fg;

%BETWEEN schid%

bullying on fgprop;

s on fgprop;

%BETWEEN cntryid%

bullying on imm1;

s on imm1;

OUTPUT: sampstat standardized;
